# Supplementary material for: miR-382-3p downregulation contributes to the carcinogenesis of lung adenocarcinoma by promoting AKT SUMOylation and phosphorylation
Source: PubMed Central journal article supplement — Exp Ther Med. 2022 May 11;24(1):440. doi: 10.3892/etm.2022.11367 (PMC9185802; doi:10.3892/etm.2022.11367), 2022-05-11

Figure S1. siRNA targeting SAE1 to knockdown endogenous SAE1 protein levels successfully. Si-SAE1 or siRNA control was transfected into A549 or H1299 for 48 h and the SAE1 protein level was detected by immunoblotting. siRNA, small interfering RNA; SAE1, small ubiquitin-like modifier 1 activating enzyme subunit 1.

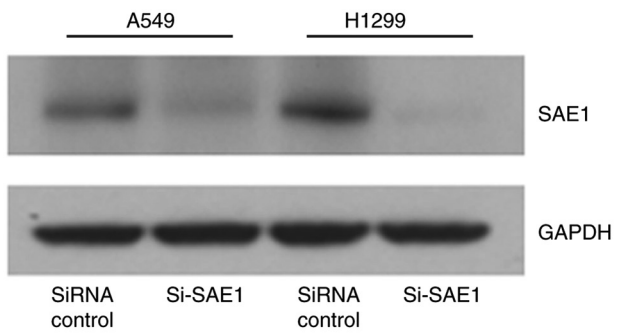

Supplement: Supplementary_Data.pdf [file Supplementary_Data.pdf]
